# Supplementary material
Source: MDPI journal article supplement (https://www.mdpi.com/2227-7390/11/21/4478)
Supplement: s1 [file s1]

## Supplementary Materials:

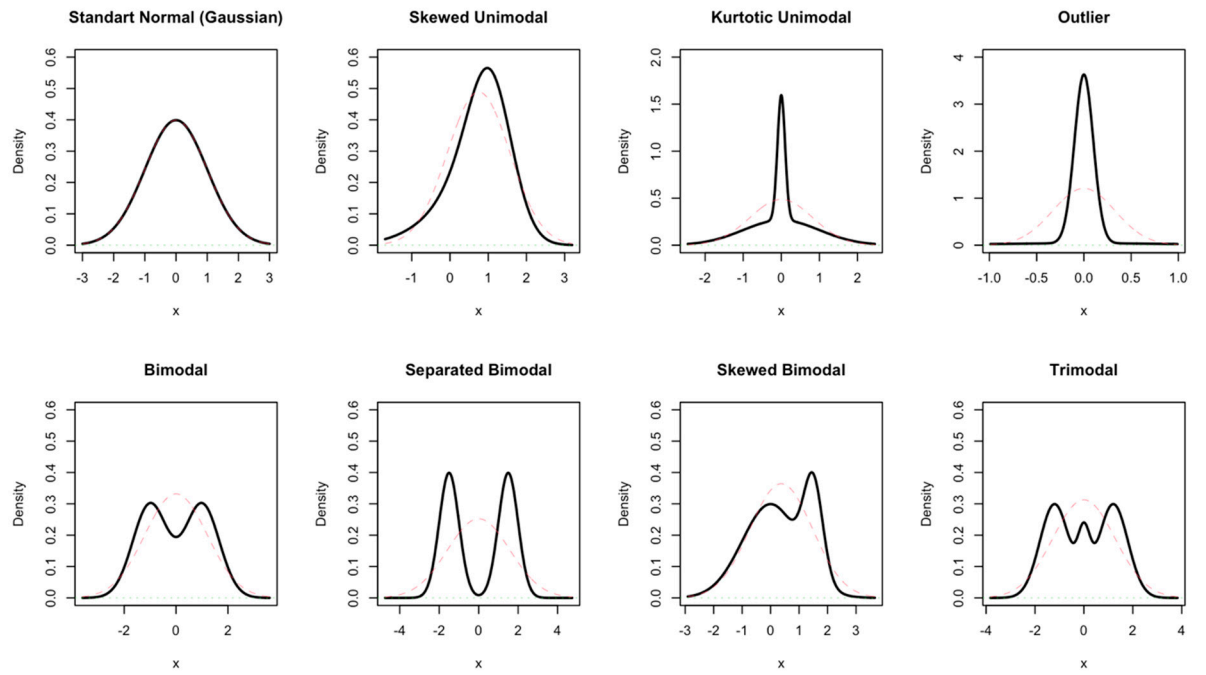

**Figure S1.** Plots of Mixture of Normal densities.

Comprehensive simulation results presented Table S1-S8.

**Table S1.** The simulation results of Gaussian distribution for 7 bandwidth methods.

| n=5<br>$h_{MISE}=0.903$   |           |       |        |       | n=10<br>$h_{MISE}=0.758$  |           |       |        |       |
|---------------------------|-----------|-------|--------|-------|---------------------------|-----------|-------|--------|-------|
| METHOD                    | $h_{AVE}$ | S     | Bias   | MSE   | METHOD                    | $h_{AVE}$ | S     | Bias   | MSE   |
| NS                        | 0.521     | 0.295 | -0.382 | 0.233 | NS                        | 0.547     | 0.176 | -0.212 | 0.076 |
| SRT                       | 0.442     | 0.250 | -0.461 | 0.275 | SRT                       | 0.464     | 0.149 | -0.294 | 0.109 |
| DPI                       | 0.485     | 0.291 | -0.418 | 0.259 | DPI                       | 0.529     | 0.196 | -0.230 | 0.091 |
| STE                       | 0.397     | 0.292 | -0.506 | 0.341 | STE                       | 0.479     | 0.218 | -0.279 | 0.125 |
| LSCV                      | 0.673     | 0.327 | -0.230 | 0.160 | LSCV                      | 0.611     | 0.216 | -0.147 | 0.069 |
| BCV                       | 0.768     | 0.288 | -0.135 | 0.101 | BCV                       | 0.696     | 0.166 | -0.062 | 0.031 |
| SCV                       | 0.708     | 0.320 | -0.195 | 0.140 | SCV                       | 0.641     | 0.197 | -0.118 | 0.053 |
| n=25<br>$h_{MISE}=0.609$  |           |       |        |       | n=50<br>$h_{MISE}=0.520$  |           |       |        |       |
| METHOD                    | $h_{AVE}$ | S     | Bias   | MSE   | METHOD                    | $h_{AVE}$ | S     | Bias   | MSE   |
| NS                        | 0.497     | 0.098 | -0.112 | 0.022 | NS                        | 0.453     | 0.061 | -0.067 | 0.008 |
| SRT                       | 0.422     | 0.083 | -0.187 | 0.042 | SRT                       | 0.384     | 0.052 | -0.136 | 0.021 |
| DPI                       | 0.491     | 0.120 | -0.118 | 0.028 | DPI                       | 0.447     | 0.082 | -0.073 | 0.012 |
| STE                       | 0.465     | 0.142 | -0.144 | 0.041 | STE                       | 0.431     | 0.098 | -0.089 | 0.017 |
| LSCV                      | 0.514     | 0.157 | -0.096 | 0.034 | LSCV                      | 0.444     | 0.128 | -0.076 | 0.022 |
| BCV                       | 0.596     | 0.085 | -0.014 | 0.007 | BCV                       | 0.517     | 0.052 | -0.003 | 0.003 |
| SCV                       | 0.547     | 0.112 | -0.063 | 0.016 | SCV                       | 0.477     | 0.078 | -0.043 | 0.008 |
| n=100<br>$h_{MISE}=0.445$ |           |       |        |       | n=200<br>$h_{MISE}=0.383$ |           |       |        |       |
| METHOD                    | $h_{AVE}$ | S     | Bias   | MSE   | METHOD                    | $h_{AVE}$ | S     | Bias   | MSE   |
| NS                        | 0.404     | 0.038 | -0.042 | 0.003 | NS                        | 0.358     | 0.023 | -0.025 | 0.001 |
| SRT                       | 0.343     | 0.032 | -0.103 | 0.012 | SRT                       | 0.304     | 0.019 | -0.079 | 0.007 |
| DPI                       | 0.400     | 0.056 | -0.045 | 0.005 | DPI                       | 0.356     | 0.037 | -0.027 | 0.002 |
| STE                       | 0.391     | 0.067 | -0.054 | 0.007 | STE                       | 0.351     | 0.043 | -0.032 | 0.003 |
| LSCV                      | 0.389     | 0.105 | -0.056 | 0.014 | LSCV                      | 0.346     | 0.082 | -0.037 | 0.008 |
| BCV                       | 0.449     | 0.034 | 0.003  | 0.001 | BCV                       | 0.391     | 0.022 | 0.008  | 0.001 |
| SCV                       | 0.418     | 0.054 | -0.027 | 0.004 | SCV                       | 0.367     | 0.035 | -0.016 | 0.001 |

**Tablo S2.** The simulation results of Skewed Unimodal distribution for 7 bandwidth methods.

| n=5<br>$h_{MISE}=0.898$   |           |       |        |       | n=10<br>$h_{MISE}=0.743$  |           |       |        |       |
|---------------------------|-----------|-------|--------|-------|---------------------------|-----------|-------|--------|-------|
| METHOD                    | $h_{AVE}$ | S     | Bias   | MSE   | METHOD                    | $h_{AVE}$ | S     | Bias   | MSE   |
| NS                        | 0.537     | 0.300 | -0.362 | 0.220 | NS                        | 0.558     | 0.187 | -0.185 | 0.069 |
| SRT                       | 0.456     | 0.254 | -0.443 | 0.261 | SRT                       | 0.474     | 0.159 | -0.269 | 0.098 |
| DPI                       | 0.498     | 0.293 | -0.401 | 0.246 | DPI                       | 0.535     | 0.201 | -0.208 | 0.084 |
| STE                       | 0.410     | 0.292 | -0.488 | 0.324 | STE                       | 0.483     | 0.223 | -0.260 | 0.117 |
| LSCV                      | 0.692     | 0.341 | -0.206 | 0.159 | LSCV                      | 0.632     | 0.231 | -0.111 | 0.066 |
| BCV                       | 0.793     | 0.313 | -0.105 | 0.109 | BCV                       | 0.733     | 0.185 | -0.009 | 0.034 |
| SCV                       | 0.723     | 0.329 | -0.175 | 0.139 | SCV                       | 0.658     | 0.202 | -0.084 | 0.048 |
| n=25<br>$h_{MISE}=0.584$  |           |       |        |       | n=50<br>$h_{MISE}=0.492$  |           |       |        |       |
| METHOD                    | $h_{AVE}$ | S     | Bias   | MSE   | METHOD                    | $h_{AVE}$ | S     | Bias   | MSE   |
| NS                        | 0.506     | 0.109 | -0.078 | 0.018 | NS                        | 0.464     | 0.069 | -0.027 | 0.005 |
| SRT                       | 0.430     | 0.092 | -0.154 | 0.032 | SRT                       | 0.394     | 0.058 | -0.097 | 0.013 |
| DPI                       | 0.489     | 0.125 | -0.096 | 0.025 | DPI                       | 0.443     | 0.085 | -0.048 | 0.010 |
| STE                       | 0.460     | 0.143 | -0.124 | 0.036 | STE                       | 0.424     | 0.100 | -0.068 | 0.015 |
| LSCV                      | 0.528     | 0.162 | -0.056 | 0.029 | LSCV                      | 0.453     | 0.133 | -0.038 | 0.019 |
| BCV                       | 0.622     | 0.094 | 0.038  | 0.010 | BCV                       | 0.541     | 0.061 | 0.049  | 0.006 |
| SCV                       | 0.550     | 0.117 | -0.035 | 0.015 | SCV                       | 0.476     | 0.080 | -0.016 | 0.007 |
| n=100<br>$h_{MISE}=0.417$ |           |       |        |       | n=200<br>$h_{MISE}=0.355$ |           |       |        |       |
| METHOD                    | $h_{AVE}$ | S     | Bias   | MSE   | METHOD                    | $h_{AVE}$ | S     | Bias   | MSE   |
| NS                        | 0.410     | 0.044 | -0.007 | 0.002 | NS                        | 0.366     | 0.028 | 0.012  | 0.001 |
| SRT                       | 0.348     | 0.037 | -0.069 | 0.006 | SRT                       | 0.311     | 0.023 | -0.044 | 0.002 |
| DPI                       | 0.390     | 0.057 | -0.027 | 0.004 | DPI                       | 0.344     | 0.038 | -0.011 | 0.002 |
| STE                       | 0.379     | 0.066 | -0.038 | 0.006 | STE                       | 0.336     | 0.045 | -0.019 | 0.002 |
| LSCV                      | 0.394     | 0.106 | -0.022 | 0.012 | LSCV                      | 0.340     | 0.088 | -0.014 | 0.008 |
| BCV                       | 0.461     | 0.042 | 0.044  | 0.004 | BCV                       | 0.393     | 0.033 | 0.038  | 0.003 |
| SCV                       | 0.410     | 0.054 | -0.006 | 0.003 | SCV                       | 0.367     | 0.037 | 0.002  | 0.001 |

**Tablo S3.** The simulation results of Kurtotic Unimodal distribution for 7 bandwidth methods.

| n=5<br>$h_{MISE}=0.374$   |           |       |        |       | n=10<br>$h_{MISE}=0.198$  |           |       |       |       |
|---------------------------|-----------|-------|--------|-------|---------------------------|-----------|-------|-------|-------|
| METHOD                    | $h_{AVE}$ | S     | Bias   | MSE   | METHOD                    | $h_{AVE}$ | S     | Bias  | MSE   |
| NS                        | 0.335     | 0.248 | -0.038 | 0.063 | NS                        | 0.336     | 0.175 | 0.138 | 0.050 |
| SRT                       | 0.285     | 0.211 | -0.089 | 0.052 | SRT                       | 0.285     | 0.149 | 0.087 | 0.030 |
| DPI                       | 0.305     | 0.241 | -0.069 | 0.063 | DPI                       | 0.297     | 0.177 | 0.099 | 0.041 |
| STE                       | 0.240     | 0.223 | -0.134 | 0.068 | STE                       | 0.249     | 0.173 | 0.051 | 0.033 |
| LSCV                      | 0.467     | 0.310 | 0.093  | 0.104 | LSCV                      | 0.355     | 0.227 | 0.157 | 0.076 |
| BCV                       | 0.591     | 0.294 | 0.217  | 0.133 | BCV                       | 0.558     | 0.180 | 0.360 | 0.161 |
| SCV                       | 0.513     | 0.304 | 0.139  | 0.112 | SCV                       | 0.436     | 0.184 | 0.238 | 0.090 |
| n=25<br>$h_{MISE}=0.124$  |           |       |        |       | n=50<br>$h_{MISE}=0.097$  |           |       |       |       |
| METHOD                    | $h_{AVE}$ | S     | Bias   | MSE   | METHOD                    | $h_{AVE}$ | S     | Bias  | MSE   |
| NS                        | 0.277     | 0.116 | 0.153  | 0.037 | NS                        | 0.241     | 0.078 | 0.144 | 0.027 |
| SRT                       | 0.235     | 0.099 | 0.111  | 0.022 | SRT                       | 0.204     | 0.066 | 0.108 | 0.016 |
| DPI                       | 0.225     | 0.111 | 0.101  | 0.023 | DPI                       | 0.172     | 0.066 | 0.075 | 0.010 |
| STE                       | 0.186     | 0.105 | 0.062  | 0.015 | STE                       | 0.134     | 0.054 | 0.037 | 0.004 |
| LSCV                      | 0.208     | 0.139 | 0.084  | 0.026 | LSCV                      | 0.116     | 0.059 | 0.020 | 0.004 |
| BCV                       | 0.483     | 0.092 | 0.359  | 0.137 | BCV                       | 0.421     | 0.061 | 0.324 | 0.109 |
| SCV                       | 0.321     | 0.100 | 0.197  | 0.049 | SCV                       | 0.243     | 0.059 | 0.146 | 0.025 |
| n=100<br>$h_{MISE}=0.079$ |           |       |        |       | n=200<br>$h_{MISE}=0.065$ |           |       |       |       |
| METHOD                    | $h_{AVE}$ | S     | Bias   | MSE   | METHOD                    | $h_{AVE}$ | S     | Bias  | MSE   |
| NS                        | 0.202     | 0.050 | 0.123  | 0.018 | NS                        | 0.177     | 0.034 | 0.112 | 0.014 |
| SRT                       | 0.171     | 0.042 | 0.093  | 0.010 | SRT                       | 0.150     | 0.029 | 0.085 | 0.008 |
| DPI                       | 0.125     | 0.033 | 0.047  | 0.003 | DPI                       | 0.098     | 0.018 | 0.033 | 0.001 |
| STE                       | 0.098     | 0.024 | 0.020  | 0.001 | STE                       | 0.077     | 0.012 | 0.012 | 0.000 |
| LSCV                      | 0.081     | 0.026 | 0.003  | 0.001 | LSCV                      | 0.065     | 0.015 | 0.000 | 0.000 |
| BCV                       | 0.357     | 0.062 | 0.279  | 0.081 | BCV                       | 0.267     | 0.100 | 0.202 | 0.051 |
| SCV                       | 0.178     | 0.029 | 0.100  | 0.011 | SCV                       | 0.135     | 0.016 | 0.070 | 0.005 |

**Tablo S4.** The simulation results of Outlier distribution for 7 bandwidth methods.

| n=5<br>$h_{MISE}=0.804$   |           |       |        |       | n=10<br>$h_{MISE}=0.654$  |           |       |        |       |
|---------------------------|-----------|-------|--------|-------|---------------------------|-----------|-------|--------|-------|
| METHOD                    | $h_{AVE}$ | S     | Bias   | MSE   | METHOD                    | $h_{AVE}$ | S     | Bias   | MSE   |
| NS                        | 0.464     | 0.281 | -0.340 | 0.195 | NS                        | 0.482     | 0.180 | -0.172 | 0.062 |
| SRT                       | 0.394     | 0.239 | -0.410 | 0.225 | SRT                       | 0.410     | 0.153 | -0.245 | 0.083 |
| DPI                       | 0.433     | 0.280 | -0.371 | 0.216 | DPI                       | 0.465     | 0.197 | -0.189 | 0.075 |
| STE                       | 0.354     | 0.277 | -0.450 | 0.279 | STE                       | 0.419     | 0.214 | -0.235 | 0.101 |
| LSCV                      | 0.621     | 0.325 | -0.183 | 0.139 | LSCV                      | 0.551     | 0.219 | -0.103 | 0.058 |
| BCV                       | 0.718     | 0.292 | -0.086 | 0.093 | BCV                       | 0.655     | 0.167 | 0.001  | 0.028 |
| SCV                       | 0.656     | 0.322 | -0.148 | 0.125 | SCV                       | 0.588     | 0.193 | -0.066 | 0.042 |
| n=25<br>$h_{MISE}=0.483$  |           |       |        |       | n=50<br>$h_{MISE}=0.351$  |           |       |        |       |
| METHOD                    | $h_{AVE}$ | S     | Bias   | MSE   | METHOD                    | $h_{AVE}$ | S     | Bias   | MSE   |
| NS                        | 0.437     | 0.105 | -0.046 | 0.013 | NS                        | 0.402     | 0.071 | 0.051  | 0.008 |
| SRT                       | 0.371     | 0.089 | -0.112 | 0.020 | SRT                       | 0.342     | 0.060 | -0.010 | 0.004 |
| DPI                       | 0.422     | 0.128 | -0.061 | 0.020 | DPI                       | 0.376     | 0.092 | 0.025  | 0.009 |
| STE                       | 0.394     | 0.147 | -0.089 | 0.030 | STE                       | 0.350     | 0.108 | -0.001 | 0.012 |
| LSCV                      | 0.443     | 0.172 | -0.040 | 0.031 | LSCV                      | 0.354     | 0.148 | 0.003  | 0.022 |
| BCV                       | 0.564     | 0.086 | 0.081  | 0.014 | BCV                       | 0.488     | 0.055 | 0.137  | 0.022 |
| SCV                       | 0.491     | 0.114 | 0.008  | 0.013 | SCV                       | 0.415     | 0.082 | 0.064  | 0.011 |
| n=100<br>$h_{MISE}=0.218$ |           |       |        |       | n=200<br>$h_{MISE}=0.146$ |           |       |        |       |
| METHOD                    | $h_{AVE}$ | S     | Bias   | MSE   | METHOD                    | $h_{AVE}$ | S     | Bias   | MSE   |
| NS                        | 0.358     | 0.046 | 0.139  | 0.022 | NS                        | 0.318     | 0.030 | 0.172  | 0.031 |
| SRT                       | 0.304     | 0.039 | 0.085  | 0.009 | SRT                       | 0.270     | 0.025 | 0.124  | 0.016 |
| DPI                       | 0.319     | 0.067 | 0.101  | 0.015 | DPI                       | 0.268     | 0.047 | 0.122  | 0.017 |
| STE                       | 0.294     | 0.082 | 0.076  | 0.012 | STE                       | 0.243     | 0.059 | 0.097  | 0.013 |
| LSCV                      | 0.259     | 0.123 | 0.041  | 0.017 | LSCV                      | 0.182     | 0.092 | 0.036  | 0.010 |
| BCV                       | 0.422     | 0.040 | 0.203  | 0.043 | BCV                       | 0.363     | 0.032 | 0.217  | 0.048 |
| SCV                       | 0.346     | 0.061 | 0.127  | 0.020 | SCV                       | 0.287     | 0.044 | 0.141  | 0.022 |

**Table S5.** The simulation results of Biomodal Normal mixture distribution for 7 bandwidth methods.

| n=5<br>$h_{MISE}=1.149$   |           |       |        |       | n=10<br>$h_{MISE}=0.899$  |           |       |        |       |
|---------------------------|-----------|-------|--------|-------|---------------------------|-----------|-------|--------|-------|
| METHOD                    | $h_{AVE}$ | S     | Bias   | MSE   | METHOD                    | $h_{AVE}$ | S     | Bias   | MSE   |
| NS                        | 0.698     | 0.333 | -0.452 | 0.315 | NS                        | 0.742     | 0.183 | -0.156 | 0.058 |
| SRT                       | 0.592     | 0.283 | -0.557 | 0.390 | SRT                       | 0.630     | 0.156 | -0.268 | 0.096 |
| DPI                       | 0.624     | 0.302 | -0.525 | 0.367 | DPI                       | 0.670     | 0.195 | -0.229 | 0.090 |
| STE                       | 0.492     | 0.302 | -0.657 | 0.523 | STE                       | 0.584     | 0.231 | -0.315 | 0.152 |
| LSCV                      | 0.802     | 0.340 | -0.348 | 0.236 | LSCV                      | 0.724     | 0.245 | -0.175 | 0.090 |
| BCV                       | 0.945     | 0.279 | -0.204 | 0.120 | BCV                       | 0.858     | 0.153 | -0.041 | 0.025 |
| SCV                       | 0.848     | 0.308 | -0.302 | 0.185 | SCV                       | 0.754     | 0.200 | -0.145 | 0.061 |
| n=25<br>$h_{MISE}=0.603$  |           |       |        |       | n=50<br>$h_{MISE}=0.472$  |           |       |        |       |
| METHOD                    | $h_{AVE}$ | S     | Bias   | MSE   | METHOD                    | $h_{AVE}$ | S     | Bias   | MSE   |
| NS                        | 0.654     | 0.084 | 0.051  | 0.010 | NS                        | 0.581     | 0.045 | 0.109  | 0.014 |
| SRT                       | 0.555     | 0.072 | -0.048 | 0.007 | SRT                       | 0.493     | 0.038 | 0.021  | 0.002 |
| DPI                       | 0.580     | 0.115 | -0.023 | 0.014 | DPI                       | 0.500     | 0.080 | 0.027  | 0.007 |
| STE                       | 0.522     | 0.149 | -0.081 | 0.029 | STE                       | 0.456     | 0.105 | -0.016 | 0.011 |
| LSCV                      | 0.570     | 0.183 | -0.032 | 0.034 | LSCV                      | 0.474     | 0.153 | 0.002  | 0.023 |
| BCV                       | 0.713     | 0.078 | 0.111  | 0.018 | BCV                       | 0.624     | 0.048 | 0.152  | 0.025 |
| SCV                       | 0.606     | 0.125 | 0.003  | 0.016 | SCV                       | 0.510     | 0.090 | 0.038  | 0.009 |
| n=100<br>$h_{MISE}=0.385$ |           |       |        |       | n=200<br>$h_{MISE}=0.322$ |           |       |        |       |
| METHOD                    | $h_{AVE}$ | S     | Bias   | MSE   | METHOD                    | $h_{AVE}$ | S     | Bias   | MSE   |
| NS                        | 0.506     | 0.027 | 0.121  | 0.015 | NS                        | 0.441     | 0.016 | 0.120  | 0.015 |
| SRT                       | 0.430     | 0.023 | 0.044  | 0.002 | SRT                       | 0.375     | 0.014 | 0.053  | 0.003 |
| DPI                       | 0.420     | 0.058 | 0.034  | 0.005 | DPI                       | 0.344     | 0.038 | -0.011 | 0.002 |
| STE                       | 0.388     | 0.073 | 0.002  | 0.005 | STE                       | 0.328     | 0.047 | 0.007  | 0.002 |
| LSCV                      | 0.395     | 0.118 | 0.010  | 0.014 | LSCV                      | 0.332     | 0.086 | 0.010  | 0.008 |
| BCV                       | 0.535     | 0.044 | 0.149  | 0.024 | BCV                       | 0.425     | 0.059 | 0.103  | 0.014 |
| SCV                       | 0.424     | 0.064 | 0.038  | 0.006 | SCV                       | 0.352     | 0.043 | 0.030  | 0.003 |

**Tablo S6.** The simulation results of Spered Biomodal Normal mixture distribution for 7 bandwidth methods.

| n=5<br>$h_{MISE}=0.586$   |           |       |        |       | n=10<br>$h_{MISE}=0.469$  |           |       |        |       |
|---------------------------|-----------|-------|--------|-------|---------------------------|-----------|-------|--------|-------|
| METHOD                    | $h_{AVE}$ | S     | Bias   | MSE   | METHOD                    | $h_{AVE}$ | S     | Bias   | MSE   |
| NS                        | 0.929     | 0.498 | 0.344  | 0.366 | NS                        | 1.005     | 0.235 | 0.535  | 0.341 |
| SRT                       | 0.789     | 0.423 | 0.203  | 0.220 | SRT                       | 0.853     | 0.199 | 0.383  | 0.187 |
| DPI                       | 0.700     | 0.355 | 0.115  | 0.139 | DPI                       | 0.658     | 0.153 | 0.189  | 0.059 |
| STE                       | 0.465     | 0.255 | -0.120 | 0.080 | STE                       | 0.477     | 0.128 | 0.008  | 0.016 |
| LSCV                      | 0.804     | 0.423 | 0.218  | 0.226 | LSCV                      | 0.576     | 0.238 | 0.107  | 0.068 |
| BCV                       | 1.261     | 0.315 | 0.675  | 0.555 | BCV                       | 1.136     | 0.140 | 0.666  | 0.464 |
| SCV                       | 0.899     | 0.282 | 0.314  | 0.178 | SCV                       | 0.689     | 0.132 | 0.219  | 0.066 |
| n=25<br>$h_{MISE}=0.366$  |           |       |        |       | n=50<br>$h_{MISE}=0.308$  |           |       |        |       |
| METHOD                    | $h_{AVE}$ | S     | Bias   | MSE   | METHOD                    | $h_{AVE}$ | S     | Bias   | MSE   |
| NS                        | 0.870     | 0.086 | 0.503  | 0.261 | NS                        | 0.766     | 0.036 | 0.458  | 0.211 |
| SRT                       | 0.738     | 0.073 | 0.372  | 0.144 | SRT                       | 0.651     | 0.030 | 0.342  | 0.118 |
| DPI                       | 0.492     | 0.054 | 0.126  | 0.019 | DPI                       | 0.394     | 0.028 | 0.086  | 0.008 |
| STE                       | 0.388     | 0.053 | 0.022  | 0.003 | STE                       | 0.330     | 0.032 | 0.021  | 0.001 |
| LSCV                      | 0.384     | 0.113 | 0.018  | 0.013 | LSCV                      | 0.312     | 0.082 | 0.004  | 0.007 |
| BCV                       | 0.920     | 0.121 | 0.554  | 0.321 | BCV                       | 0.436     | 0.141 | 0.128  | 0.036 |
| SCV                       | 0.482     | 0.053 | 0.116  | 0.016 | SCV                       | 0.381     | 0.028 | 0.073  | 0.006 |
| n=100<br>$h_{MISE}=0.262$ |           |       |        |       | n=200<br>$h_{MISE}=0.224$ |           |       |        |       |
| METHOD                    | $h_{AVE}$ | S     | Bias   | MSE   | METHOD                    | $h_{AVE}$ | S     | Bias   | MSE   |
| NS                        | 0.667     | 0.022 | 0.405  | 0.164 | NS                        | 0.581     | 0.013 | 0.357  | 0.128 |
| SRT                       | 0.566     | 0.018 | 0.304  | 0.093 | SRT                       | 0.493     | 0.011 | 0.269  | 0.073 |
| DPI                       | 0.319     | 0.017 | 0.057  | 0.004 | DPI                       | 0.262     | 0.011 | 0.039  | 0.002 |
| STE                       | 0.278     | 0.021 | 0.017  | 0.001 | STE                       | 0.237     | 0.014 | 0.014  | 0.000 |
| LSCV                      | 0.261     | 0.060 | -0.001 | 0.004 | LSCV                      | 0.223     | 0.046 | -0.001 | 0.002 |
| BCV                       | 0.304     | 0.028 | 0.043  | 0.003 | BCV                       | 0.247     | 0.019 | 0.023  | 0.001 |
| SCV                       | 0.307     | 0.017 | 0.046  | 0.002 | SCV                       | 0.253     | 0.011 | 0.030  | 0.001 |

**Tablo S7.** The simulation results of Skewed Biomodal Normal mixture distribution for 7 bandwidth methods.

| n=5<br>$h_{MISE}=1.017$   |           |       |        |       | n=10<br>$h_{MISE}=0.817$  |           |       |        |       |
|---------------------------|-----------|-------|--------|-------|---------------------------|-----------|-------|--------|-------|
| METHOD                    | $h_{AVE}$ | S     | Bias   | MSE   | METHOD                    | $h_{AVE}$ | S     | Bias   | MSE   |
| NS                        | 0.619     | 0.309 | -0.398 | 0.254 | NS                        | 0.651     | 0.181 | -0.166 | 0.061 |
| SRT                       | 0.525     | 0.262 | -0.492 | 0.310 | SRT                       | 0.553     | 0.154 | -0.265 | 0.094 |
| DPI                       | 0.558     | 0.292 | -0.459 | 0.296 | DPI                       | 0.599     | 0.193 | -0.218 | 0.085 |
| STE                       | 0.445     | 0.294 | -0.571 | 0.413 | STE                       | 0.524     | 0.221 | -0.293 | 0.135 |
| LSCV                      | 0.739     | 0.332 | -0.278 | 0.188 | LSCV                      | 0.641     | 0.236 | -0.176 | 0.087 |
| BCV                       | 0.850     | 0.284 | -0.167 | 0.108 | BCV                       | 0.771     | 0.164 | -0.046 | 0.029 |
| SCV                       | 0.768     | 0.315 | -0.249 | 0.161 | SCV                       | 0.687     | 0.195 | -0.130 | 0.055 |
| n=25<br>$h_{MISE}=0.555$  |           |       |        |       | n=50<br>$h_{MISE}=0.408$  |           |       |        |       |
| METHOD                    | $h_{AVE}$ | S     | Bias   | MSE   | METHOD                    | $h_{AVE}$ | S     | Bias   | MSE   |
| NS                        | 0.587     | 0.089 | 0.032  | 0.009 | NS                        | 0.525     | 0.047 | 0.117  | 0.016 |
| SRT                       | 0.498     | 0.076 | -0.057 | 0.009 | SRT                       | 0.446     | 0.040 | 0.038  | 0.003 |
| DPI                       | 0.533     | 0.110 | -0.022 | 0.013 | DPI                       | 0.459     | 0.073 | 0.050  | 0.008 |
| STE                       | 0.482     | 0.142 | -0.073 | 0.025 | STE                       | 0.415     | 0.099 | 0.007  | 0.010 |
| LSCV                      | 0.515     | 0.176 | -0.040 | 0.033 | LSCV                      | 0.421     | 0.146 | 0.013  | 0.021 |
| BCV                       | 0.653     | 0.082 | 0.098  | 0.016 | BCV                       | 0.568     | 0.050 | 0.159  | 0.028 |
| SCV                       | 0.565     | 0.116 | 0.011  | 0.014 | SCV                       | 0.472     | 0.081 | 0.064  | 0.011 |
| n=100<br>$h_{MISE}=0.318$ |           |       |        |       | n=200<br>$h_{MISE}=0.258$ |           |       |        |       |
| METHOD                    | $h_{AVE}$ | S     | Bias   | MSE   | METHOD                    | $h_{AVE}$ | S     | Bias   | MSE   |
| NS                        | 0.461     | 0.029 | 0.143  | 0.021 | NS                        | 0.403     | 0.017 | 0.146  | 0.022 |
| SRT                       | 0.391     | 0.024 | 0.073  | 0.006 | SRT                       | 0.342     | 0.014 | 0.085  | 0.007 |
| DPI                       | 0.380     | 0.052 | 0.062  | 0.007 | DPI                       | 0.314     | 0.036 | 0.056  | 0.005 |
| STE                       | 0.342     | 0.069 | 0.024  | 0.005 | STE                       | 0.283     | 0.046 | 0.026  | 0.003 |
| LSCV                      | 0.333     | 0.109 | 0.015  | 0.012 | LSCV                      | 0.266     | 0.081 | 0.009  | 0.007 |
| BCV                       | 0.493     | 0.034 | 0.176  | 0.032 | BCV                       | 0.416     | 0.046 | 0.159  | 0.027 |
| SCV                       | 0.386     | 0.058 | 0.068  | 0.008 | SCV                       | 0.316     | 0.041 | 0.059  | 0.005 |



**Tablo S8.** The simulation results of Triomodal Normal mixture distribution for 7 bandwidth methods.

| n=5<br>$h_{MISE}=0.926$   |           |       |        |       | n=10<br>$h_{MISE}=0.778$  |           |       |        |       |
|---------------------------|-----------|-------|--------|-------|---------------------------|-----------|-------|--------|-------|
| METHOD                    | $h_{AVE}$ | S     | Bias   | MSE   | METHOD                    | $h_{AVE}$ | S     | Bias   | MSE   |
| NS                        | 0.549     | 0.279 | -0.378 | 0.220 | NS                        | 0.573     | 0.172 | -0.205 | 0.071 |
| SRT                       | 0.466     | 0.237 | -0.460 | 0.268 | SRT                       | 0.486     | 0.146 | -0.291 | 0.106 |
| DPI                       | 0.495     | 0.256 | -0.431 | 0.251 | DPI                       | 0.546     | 0.184 | -0.231 | 0.087 |
| STE                       | 0.394     | 0.251 | -0.533 | 0.347 | STE                       | 0.487     | 0.212 | -0.291 | 0.129 |
| LSCV                      | 0.668     | 0.293 | -0.258 | 0.152 | LSCV                      | 0.610     | 0.205 | -0.167 | 0.070 |
| BCV                       | 0.766     | 0.251 | -0.161 | 0.089 | BCV                       | 0.694     | 0.146 | -0.084 | 0.028 |
| SCV                       | 0.698     | 0.266 | -0.229 | 0.123 | SCV                       | 0.645     | 0.179 | -0.133 | 0.050 |
| n=25<br>$h_{MISE}=0.617$  |           |       |        |       | n=50<br>$h_{MISE}=0.512$  |           |       |        |       |
| METHOD                    | $h_{AVE}$ | S     | Bias   | MSE   | METHOD                    | $h_{AVE}$ | S     | Bias   | MSE   |
| NS                        | 0.511     | 0.089 | -0.106 | 0.019 | NS                        | 0.459     | 0.048 | -0.053 | 0.005 |
| SRT                       | 0.433     | 0.075 | -0.183 | 0.039 | SRT                       | 0.390     | 0.041 | -0.122 | 0.017 |
| DPI                       | 0.496     | 0.108 | -0.121 | 0.026 | DPI                       | 0.449     | 0.071 | -0.063 | 0.009 |
| STE                       | 0.463     | 0.133 | -0.153 | 0.041 | STE                       | 0.426     | 0.093 | -0.085 | 0.016 |
| LSCV                      | 0.495     | 0.151 | -0.122 | 0.038 | LSCV                      | 0.422     | 0.126 | -0.089 | 0.024 |
| BCV                       | 0.580     | 0.071 | -0.036 | 0.006 | BCV                       | 0.505     | 0.043 | -0.007 | 0.002 |
| SCV                       | 0.537     | 0.105 | -0.080 | 0.018 | SCV                       | 0.471     | 0.071 | -0.041 | 0.007 |
| n=100<br>$h_{MISE}=0.415$ |           |       |        |       | n=200<br>$h_{MISE}=0.328$ |           |       |        |       |
| METHOD                    | $h_{AVE}$ | S     | Bias   | MSE   | METHOD                    | $h_{AVE}$ | S     | Bias   | MSE   |
| NS                        | 0.406     | 0.028 | -0.009 | 0.001 | NS                        | 0.356     | 0.016 | 0.028  | 0.001 |
| SRT                       | 0.345     | 0.024 | -0.070 | 0.006 | SRT                       | 0.302     | 0.013 | -0.026 | 0.001 |
| DPI                       | 0.393     | 0.050 | -0.022 | 0.003 | DPI                       | 0.341     | 0.034 | 0.013  | 0.001 |
| STE                       | 0.377     | 0.067 | -0.038 | 0.006 | STE                       | 0.328     | 0.046 | -0.000 | 0.002 |
| LSCV                      | 0.363     | 0.103 | -0.052 | 0.013 | LSCV                      | 0.307     | 0.086 | -0.021 | 0.008 |
| BCV                       | 0.440     | 0.027 | 0.025  | 0.001 | BCV                       | 0.382     | 0.018 | 0.054  | 0.003 |
| SCV                       | 0.406     | 0.051 | -0.010 | 0.003 | SCV                       | 0.349     | 0.036 | 0.021  | 0.002 |

Density plots of the kernel density estimates, based on the simulation results, are presented in Figures S2 –S9.

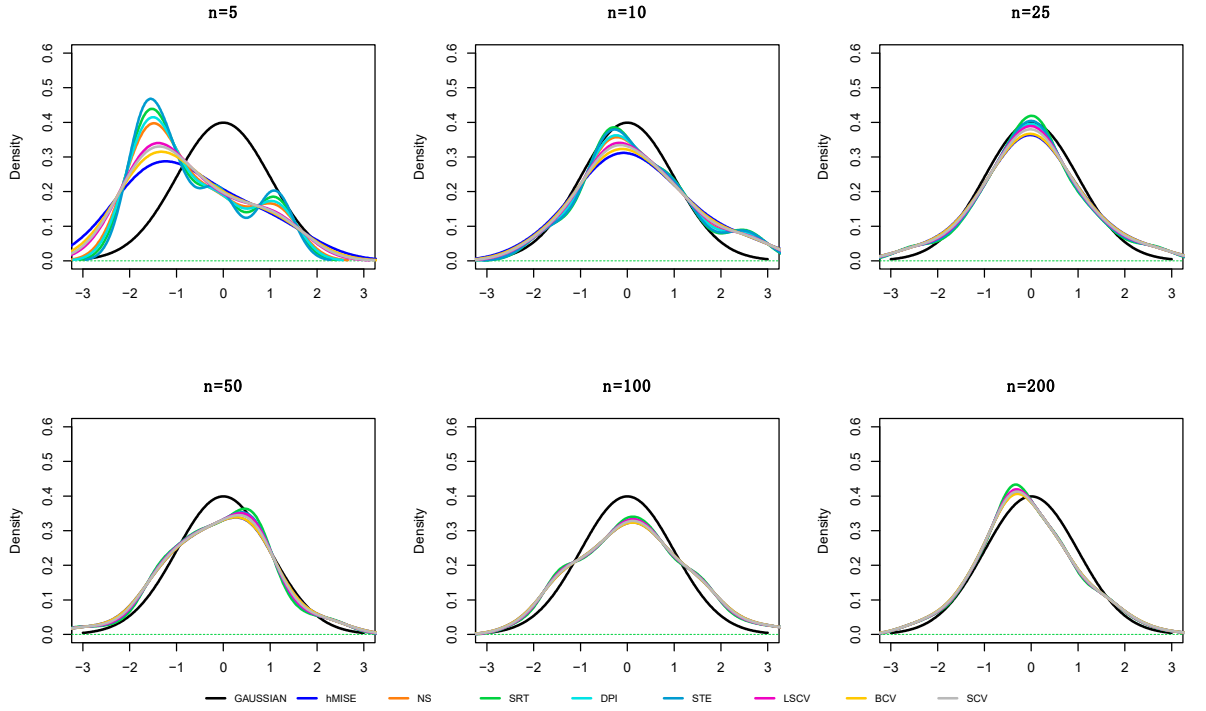

**Figure S2.** Kernel Density Estimates of a Gaussian distribution using the optimal bandwidth and 7 different bandwidth methods.

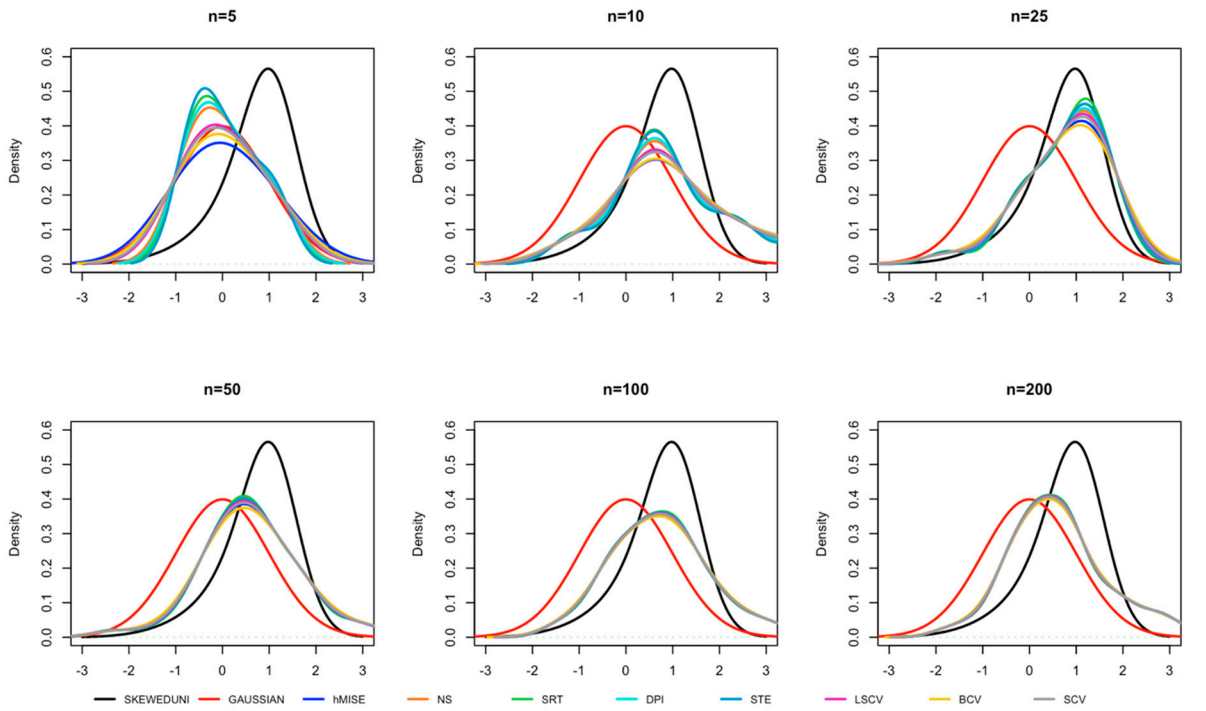

**Figure S3.** Kernel Density Estimates of a skewed unimodal density

$\left[ \frac{1}{5}N(0,1) + \frac{1}{5}N\left(\frac{1}{2}, \left(\frac{2}{3}\right)^2\right) + \frac{3}{5}N\left(\frac{13}{12}, \left(\frac{5}{9}\right)^2\right) \right]$  using the optimal bandwidth and 7 different bandwidth methods.

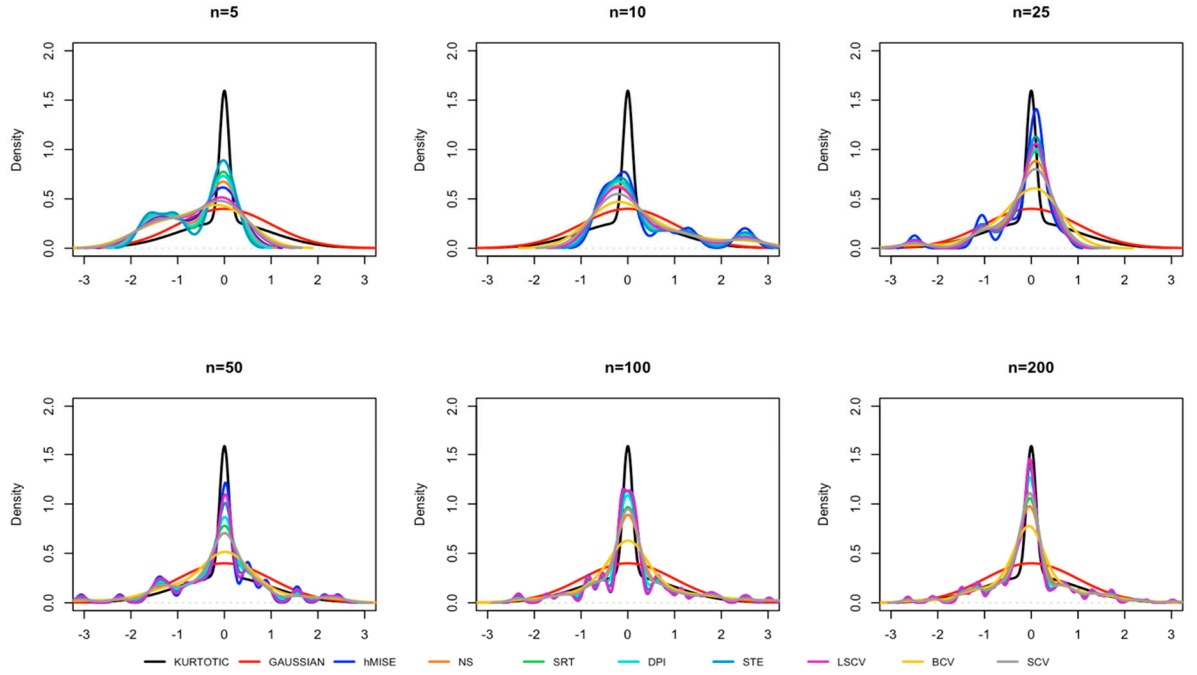

**Figure S4.** Kernel Density Estimates of a kurtotic unimodal distribution

$\left[ \frac{2}{3}N(0,1) + \frac{1}{3}N\left(0, \left(\frac{1}{10}\right)^2\right) \right]$  using the optimal bandwidth and 7 different bandwidth methods.

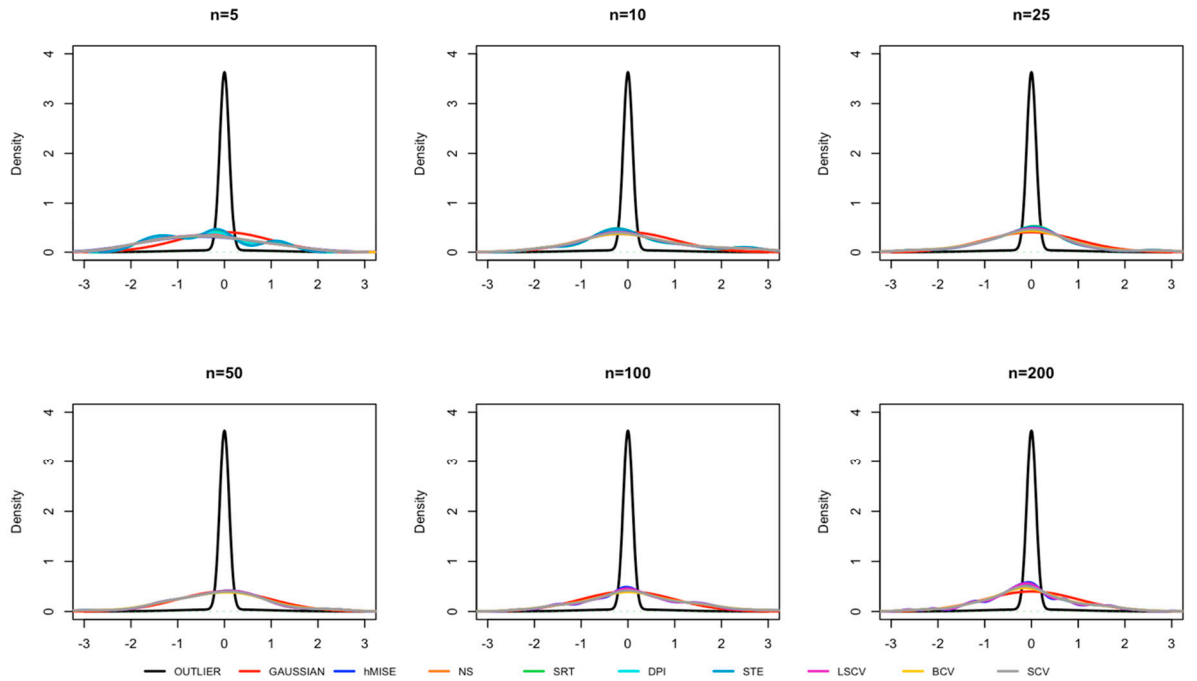

**Figure S5.** Kernel Density Estimates of a normal mixture distribution

$\left[ \frac{1}{10}N(0,1) + \frac{9}{10}N\left(0, \left(\frac{1}{10}\right)^2\right) \right]$  using the optimal bandwidth and 7 different bandwidth methods.

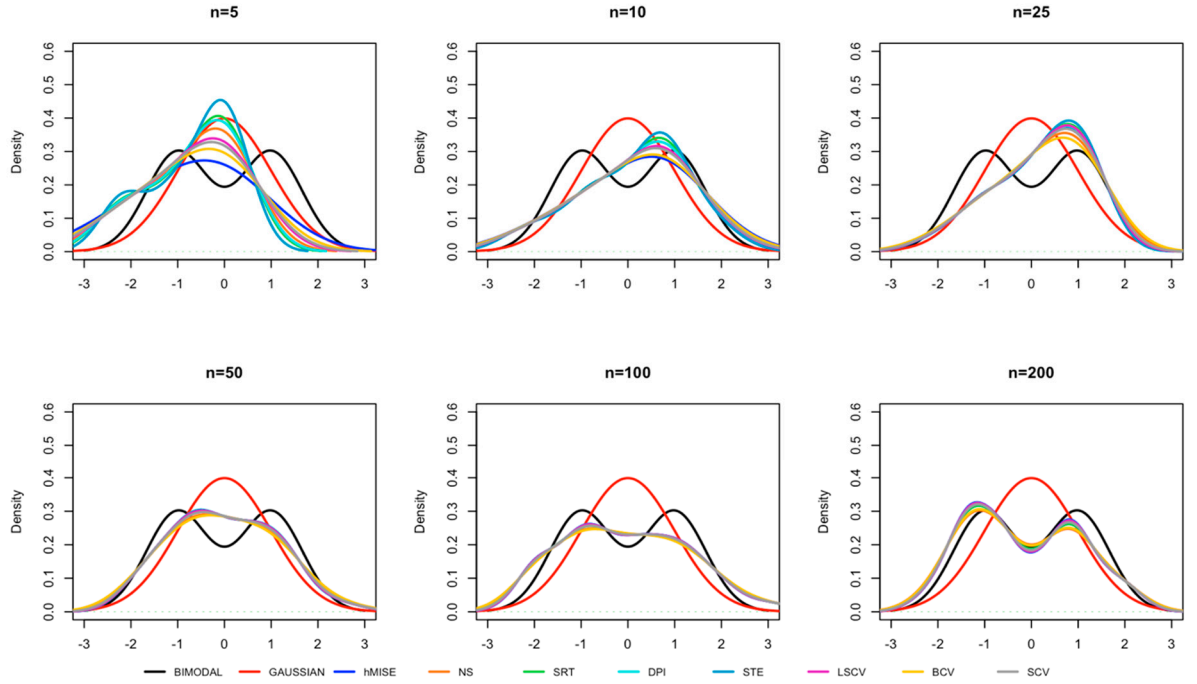

**Figure S6.** Kernel Density Estimates of a bimodal normal mixture distribution

$\left[ \frac{1}{2} N\left(-1, \left(\frac{2}{3}\right)^2\right) + \frac{1}{2} N\left(1, \left(\frac{2}{3}\right)^2\right) \right]$  using the optimal bandwidth and 7 different bandwidth methods.

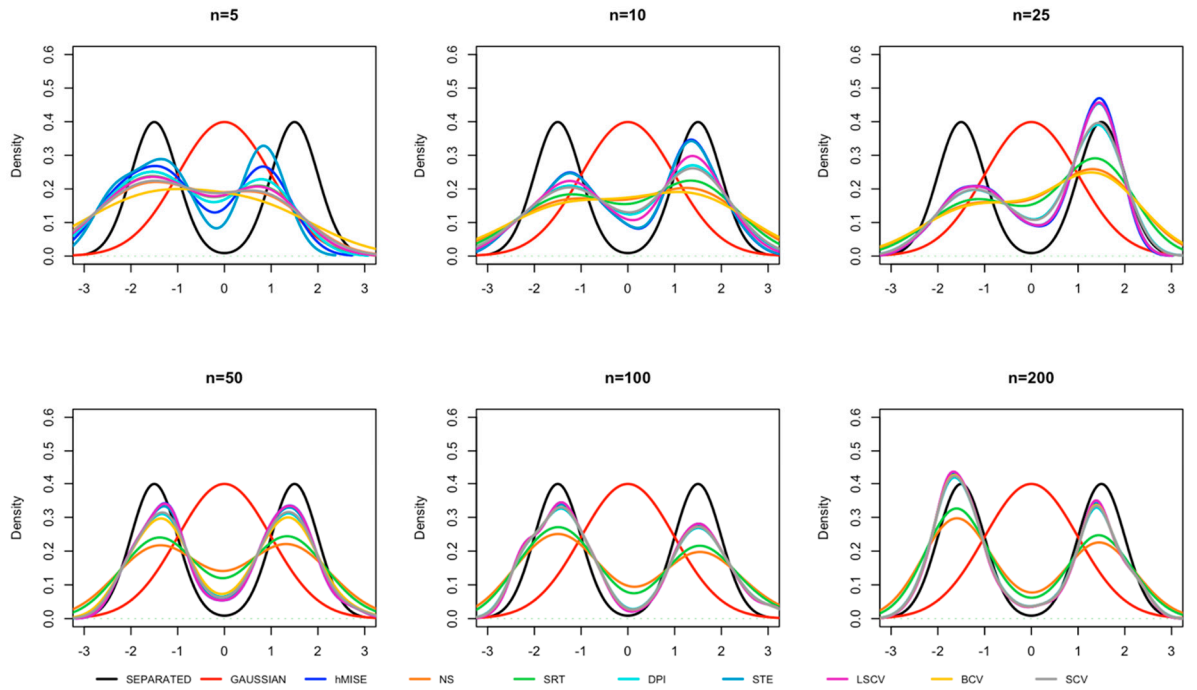

**Figure S7.** Kernel Density Estimates of a separated bimodal normal mixture distribution

$\left[ \frac{1}{2} N\left(-\frac{3}{2}, \left(\frac{1}{2}\right)^2\right) + \frac{1}{2} N\left(\frac{3}{2}, \left(\frac{1}{2}\right)^2\right) \right]$  using the optimal bandwidth and 7 different bandwidth methods.

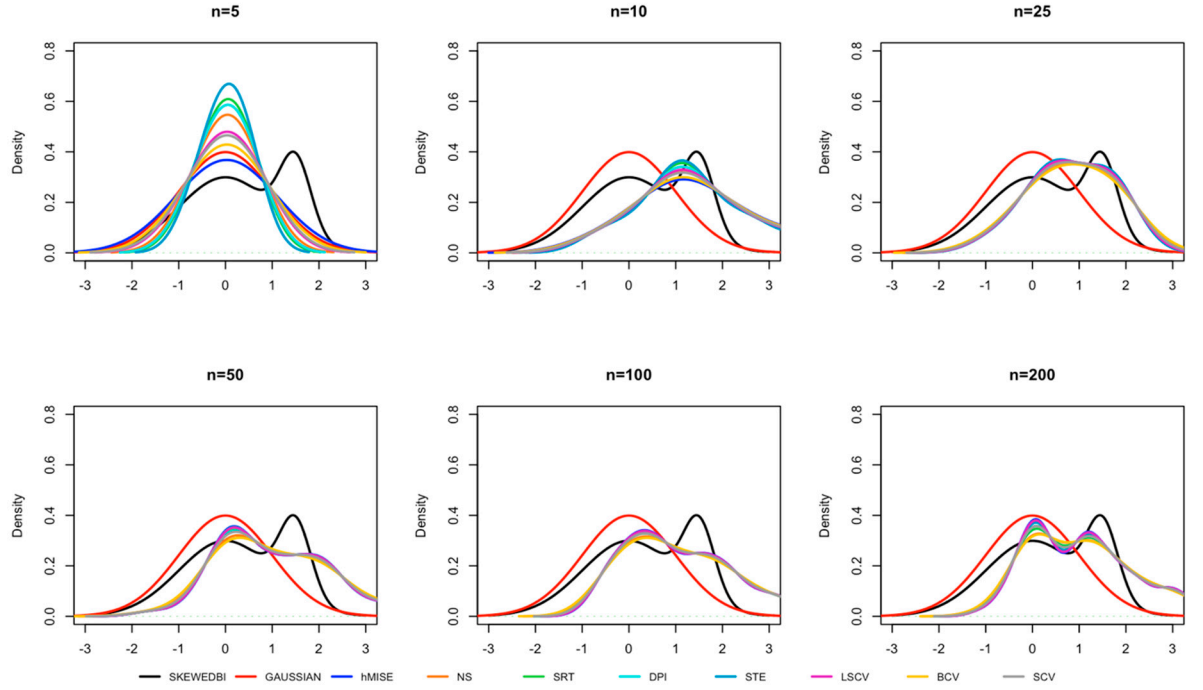

**Figure S8.** Kernel Density Estimates of a skewed bimodal normal mixture distribution  $\left[ \frac{3}{4}N(0,1) + \frac{1}{4}N\left(\frac{3}{2}, \left(\frac{1}{3}\right)^2\right) \right]$  using the optimal bandwidth and 7 different bandwidth methods.

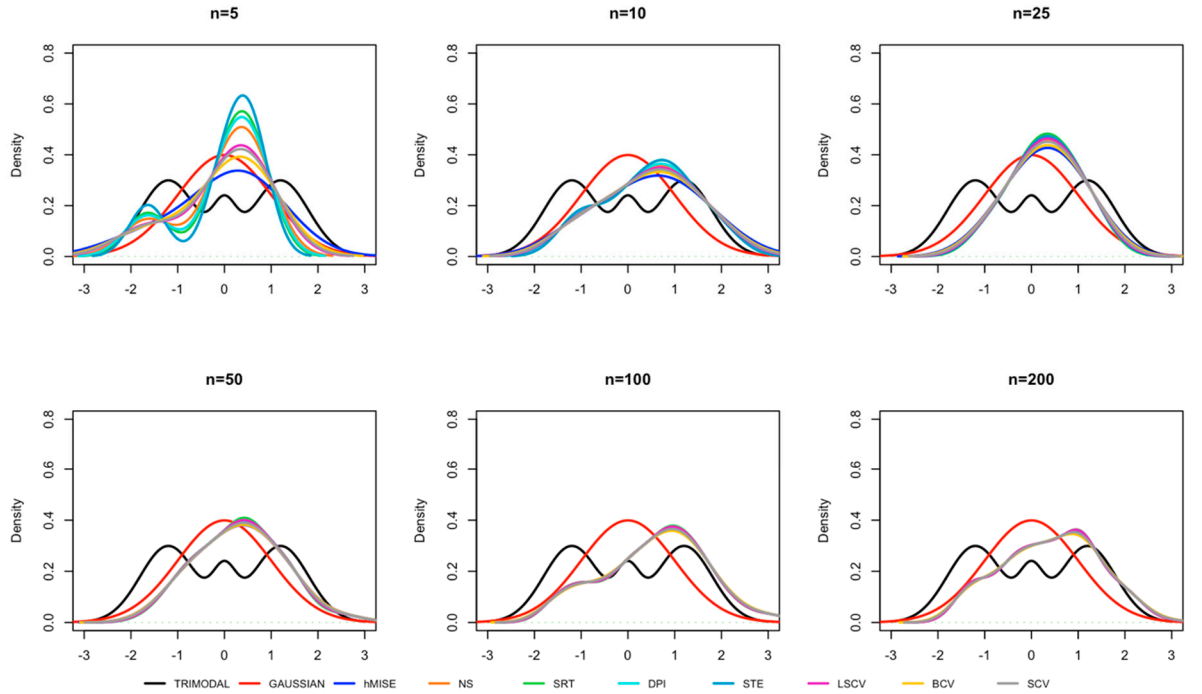

**Figure S9.** Kernel Density Estimates of a trimodal normal mixture distribution  $\left[ \frac{9}{20}N\left(-\frac{6}{5}, \left(\frac{3}{5}\right)^2\right) + \frac{9}{20}N\left(\frac{6}{5}, \left(\frac{3}{5}\right)^2\right) + \frac{1}{10}N\left(0, \left(\frac{1}{4}\right)^2\right) \right]$  using the optimal bandwidth and 7 different bandwidth methods.
